# Supplementary material
Source: PubMed Central journal article supplement (PMC7262211)
Supplement: MJA2-212-416-s001.pdf [file MJA2-212-416-s001.pdf]

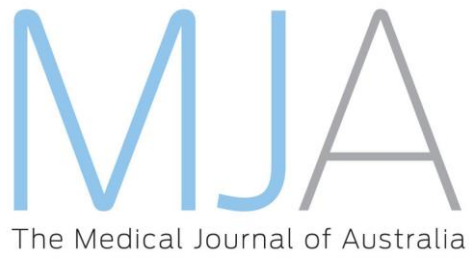

## **Supporting Information**

### **Supplementary results**

**This appendix was part of the submitted manuscript and has been peer reviewed.  
It is posted as supplied by the authors.**

Appendix to: Zha L, Li S, Pan L, et al. Corticosteroid treatment of patients with coronavirus disease 2019 (COVID-19). *Med J Aust* 2020; doi: 10.5694/mja2.50577.

**Table. Laboratory results and radiologic findings for 31 patients with coronavirus disease 2019 (COVID-19) on admission to hospital**

| Variables                                                | All patients     | Therapy            |                  | P     |
|----------------------------------------------------------|------------------|--------------------|------------------|-------|
|                                                          |                  | Non-corticosteroid | Corticosteroid   |       |
| Number of patients                                       | 31               | 20                 | 11               |       |
| White blood cell count ( $\times 10^9/L$ ), median (IQR) | 5.26 (4.28–6.56) | 5.2 (4.5–6.16)     | 5.97 (4.28–6.85) | 0.54  |
| Neutrophil count ( $\times 10^9/L$ ), median (IQR)       | 3.12 (2.44–4.19) | 3.03 (2.28–3.52)   | 3.23 (2.66–5.11) | 0.26  |
| Lymphocyte count ( $\times 10^9/L$ ), median (IQR)       | 1.39 (0.96–1.64) | 1.54 (1.25–1.77)   | 0.99 (0.88–1.29) | 0.012 |
| Platelet count ( $\times 10^9/L$ ), median (IQR)         | 152 (134–178)    | 155 (138–169)      | 150 (122–180)    | 0.58  |
| Haemoglobin (g/L), median (IQR)                          | 132 (118–145)    | 135 (116–148)      | 131 (124–140)    | 0.70  |
| APTT (sec), median (IQR)                                 | 32.2 (20–36)     | 32.5 (30.8–36)     | 31.7 (27.9–34.5) | 0.42  |
| D-dimer (mg/L), median (IQR)                             | 0.72 (0.49–1.21) | 0.7 (0.5–1.2)      | 0.8 (0.49–1.16)  | 0.94  |
| Alanine aminotransferase (U/L), median (IQR)             | 21 (15.5–30.5)   | 24 (15–31.5)       | 17 (15.5–26)     | 0.50  |
| Albumin (g/L), median (IQR)                              | 41.6 (39.3–43.3) | 41.9 (39.8–43.4)   | 40.9 (38–42)     | 0.30  |
| Creatine ( $\mu\text{mol/L}$ ), median (IQR)             | 70.5 (56.5–78.5) | 63 (52.5–75.5)     | 76 (68–79.5)     | 0.12  |
| Lactate dehydrogenase (U/L), median (IQR)                | 180 (154–212)    | 177 (154–194)      | 212 (158–245)    | 0.26  |
| Creatine kinase (U/L), median (IQR)                      | 48 (41–72)       | 47.5 (40.5–78)     | 59 (44.5–66.5)   | 0.64  |
| Cardiac troponin (ng/mL), median (IQR)                   | 0.21 (0.16–0.23) | 0.21 (0.13–0.22)   | 0.22 (0.20–0.24) | 0.31  |
| Procalcitonin (ng/mL), median (IQR)                      | 0.21 (0.12–0.27) | 0.21 (0.11–0.31)   | 0.21 (0.14–0.23) | 0.62  |
| C-reactive protein (mg/L), median (IQR)                  | 23.2 (6.9–90)    | 18.7 (4.77–29.6)   | 84 (18.6–150)    | 0.026 |
| <b>Radiologic findings</b>                               |                  |                    |                  |       |
| Pneumonia                                                | 29 (94%)         | 18 (90%)           | 11 (100%)        | 0.75  |
| Bilateral involvement on chest computer tomography       | 20 (64%)         | 9 (45%)            | 11 (100%)        | 0.009 |

IQR = interquartile range.
